# Supplementary material for: The Dissection of Meiotic Chromosome Movement in Mice Using an In Vivo Electroporation Technique
Source: PubMed Central journal article supplement (PMC4263375; doi:10.1371/journal.pgen.1004821), 2014-12-11

A

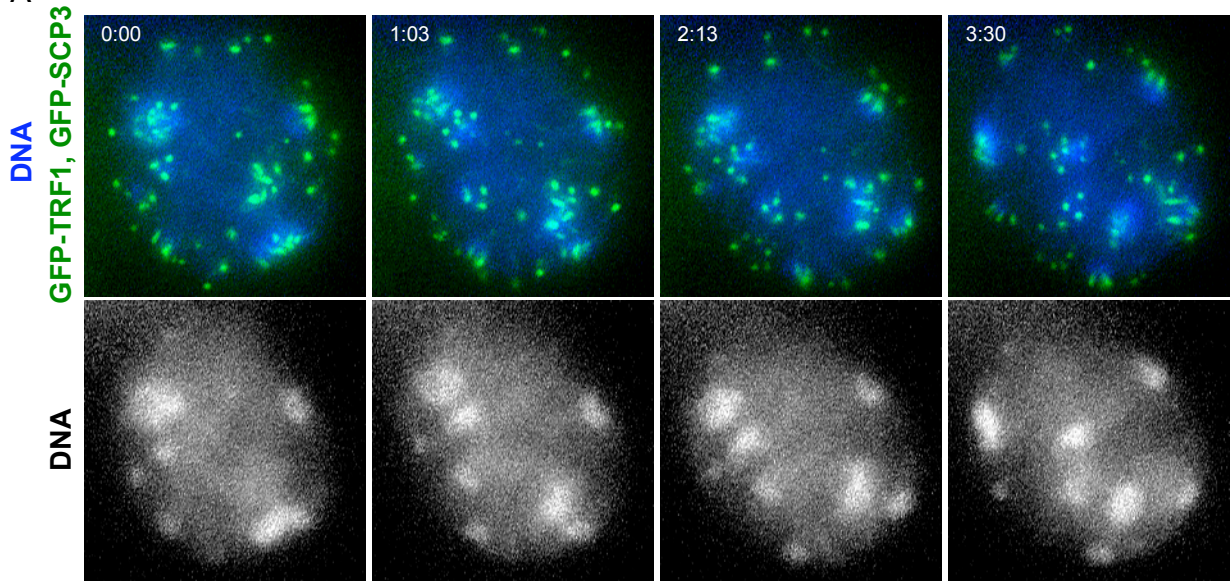

B

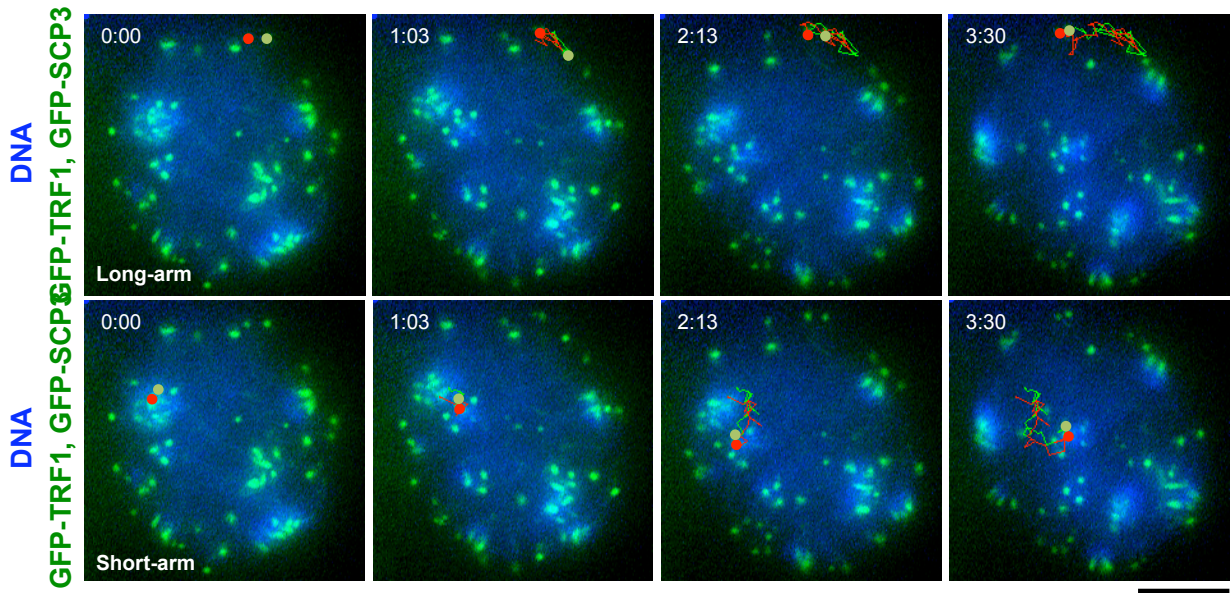

Supplement: pgen.1004821.s006.pdf [file pgen.1004821.s006.pdf]
